CORRECTION

# Correction: Cardiorespiratory Fitness, Sedentary Behaviour and Physical Activity Are Independently Associated with the Metabolic Syndrome, Results from the SCAPIS Pilot Study

Örjan Ekblom, Elin Ekblom-Bak, Annika Rosengren, Mattias Hallsten, Göran Bergström, Mats Börjesson

There are errors in Figs 1–5. There are also errors in Table 3 and Table 4. The corrected figures and tables are based on the NCEP Adult Treatment Panel III (ATPIII panel). Please see the correct Figs 1–5 and the correct Table 3 and Table 4 below.

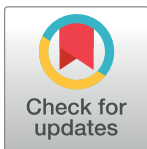

**OPEN ACCESS**

**Citation:** Ekblom Ö, Ekblom-Bak E, Rosengren A, Hallsten M, Bergström G, Börjesson M (2018) Correction: Cardiorespiratory Fitness, Sedentary Behaviour and Physical Activity Are Independently Associated with the Metabolic Syndrome, Results from the SCAPIS Pilot Study. PLoS ONE 13(5): e0197801. <https://doi.org/10.1371/journal.pone.0197801>

**Published:** May 22, 2018

**Copyright:** © 2018 Ekblom et al. This is an open access article distributed under the terms of the [Creative Commons Attribution License](https://creativecommons.org/licenses/by/4.0/), which permits unrestricted use, distribution, and reproduction in any medium, provided the original author and source are credited.

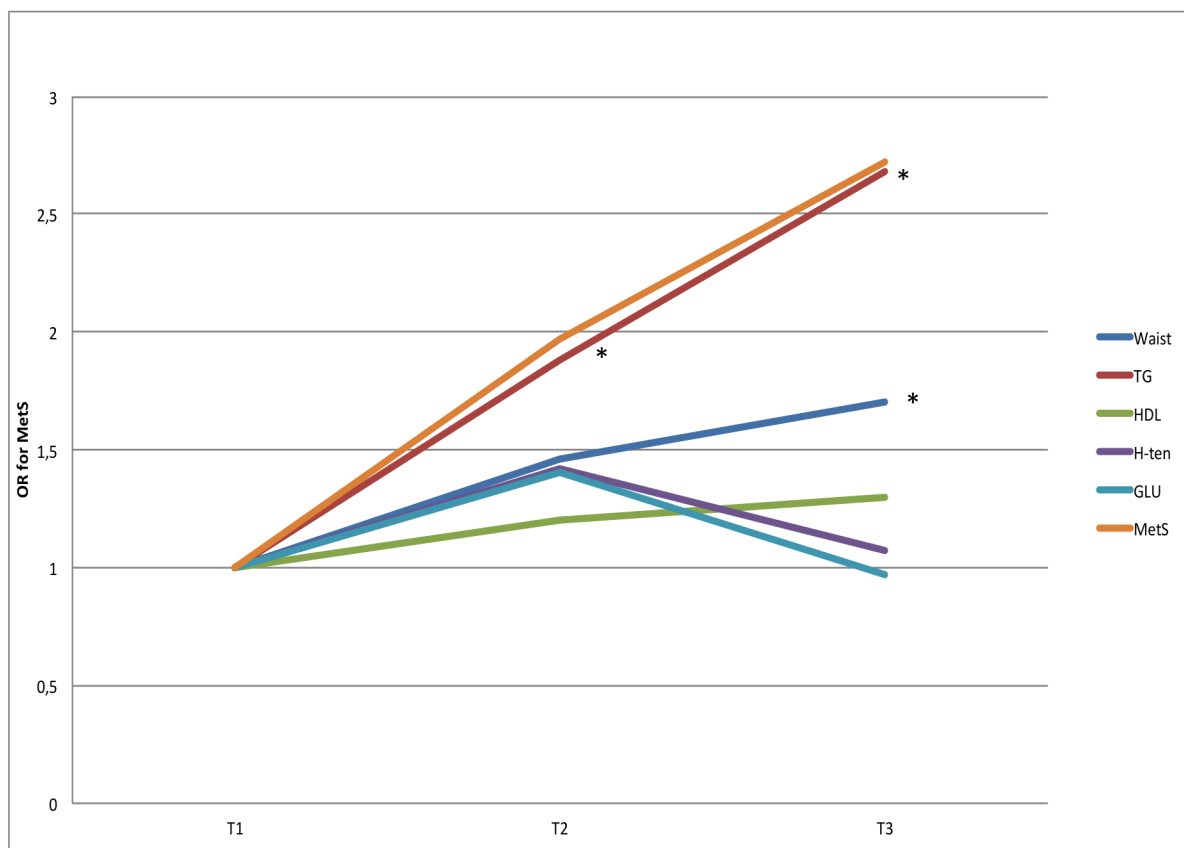

**Fig 1. OR for MetS for tertiles of sedentary time.** ORs are adjusted for gender, age, education level (university degree vs. not), energy intake ( $\text{kcal}\cdot\text{d}^{-1}$  in quartiles), smoking habits (regular smoker vs. not) and psycho-social stress (self-reported into four levels), estimated  $\text{VO}_2\text{max}$  ( $\text{ml}\cdot\text{min}^{-1}\cdot\text{kg}^{-1}$ , in tertiles) and % of wear time spent in MVPA (in tertiles). \* Denotes significant difference to reference group.

<https://doi.org/10.1371/journal.pone.0197801.g001>

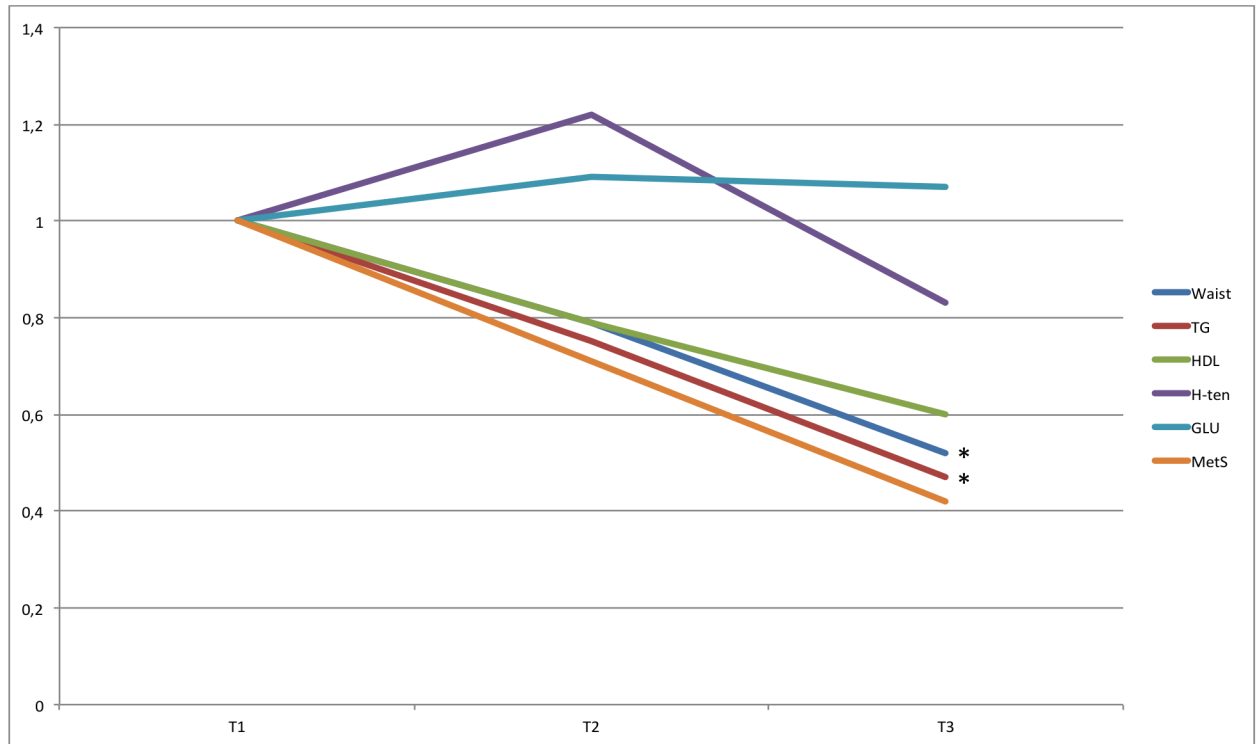

**Fig 2. OR for MetS for tertiles of time in LIPA.** ORs are adjusted for gender, age, education level (university degree vs. not), energy intake ( $\text{kcal}\cdot\text{d}^{-1}$  in quartiles), smoking habits (regular smoker vs. not) and psycho-social stress (self-reported into four levels), % of wear time spent in MVPA (in tertiles), and estimated  $\text{VO}_2\text{max}$  ( $\text{ml}\cdot\text{min}^{-1}\cdot\text{kg}^{-1}$ , in tertiles). \* Denotes significant difference to reference group.

<https://doi.org/10.1371/journal.pone.0197801.g002>

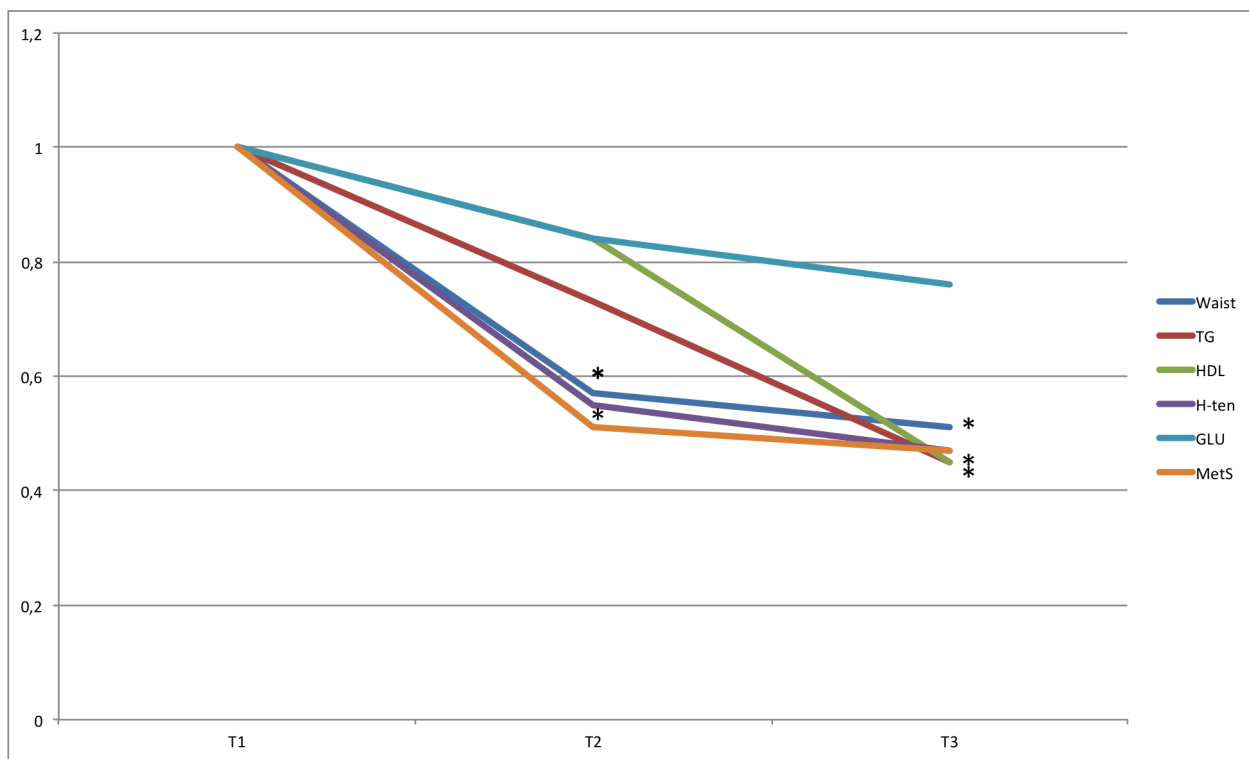

**Fig 3. OR for MetS for tertiles of time in MVPA.** ORs are adjusted for gender, age, education level (university degree vs. not), energy intake ( $\text{kcal}\cdot\text{d}^{-1}$  in quartiles), smoking habits (regular smoker vs. not) and psycho-social stress (self-reported into four levels), % of wear time spent in SED (in tertiles), and estimated  $\text{VO}_2\text{max}$  ( $\text{ml}\cdot\text{min}^{-1}\cdot\text{kg}^{-1}$ , in tertiles). \* Denotes significant difference to reference group.

<https://doi.org/10.1371/journal.pone.0197801.g003>

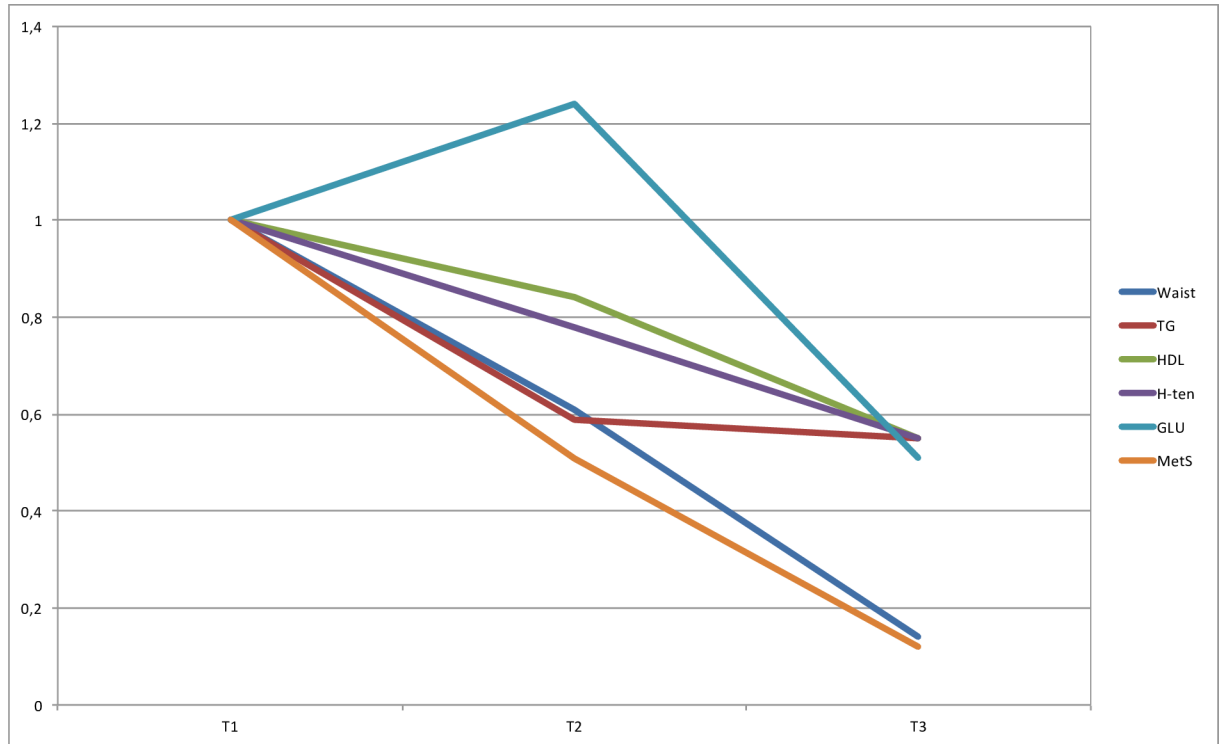

**Fig 4. OR for MetS for tertiles of fitness.** ORs are adjusted for gender, age, education level (university degree vs. not), energy intake ( $\text{kcal}\cdot\text{d}^{-1}$  in quartiles), smoking habits (regular smoker vs. not) and psycho-social stress (self-reported into four levels), % of wear time spent in SED (in tertiles), and % of wear time spent in MVPA (in tertiles). \* Denotes significant difference to reference group.

<https://doi.org/10.1371/journal.pone.0197801.g004>

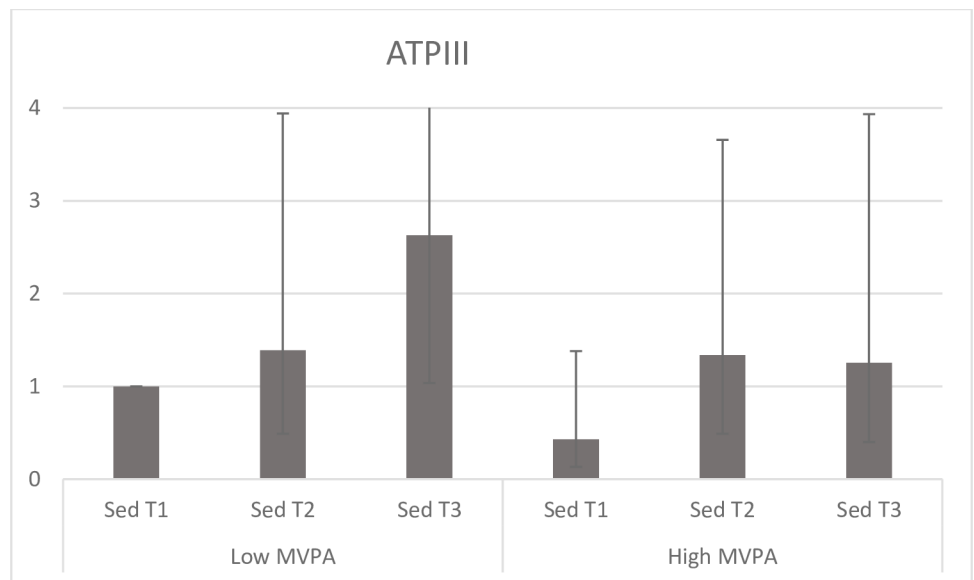

**Fig 5. Stratified analysis across SED tertiles in high (above median) and low (below median) MVPA.** ORs are adjusted for gender, age (yrs.), education level (university degree vs. not), energy intake ( $\text{kcal}\cdot\text{d}^{-1}$ , in quartiles), smoking habits (regular vs. not), psychosocial stress (self-reported into four levels) and fitness (in tertiles).

<https://doi.org/10.1371/journal.pone.0197801.g005>

Table 3. Analyzed using ATPIII-cutoffs for uniaxial accelerometry.

|                             |                        | n   | Tertile 2               | Tertile 3               |
|-----------------------------|------------------------|-----|-------------------------|-------------------------|
| <b><u>Fitness</u></b>       |                        |     |                         |                         |
|                             | Age-gender             | 784 | <b>0.50 (0.31–0.74)</b> | <b>0.09 (0.04–0.18)</b> |
|                             | +Lifestyle             | 709 | <b>0.41 (0.26–0.67)</b> | <b>0.08 (0.04–0.18)</b> |
|                             | +SED                   | 630 | <b>0.46 (0.27–0.79)</b> | <b>0.11 (0.05–0.29)</b> |
|                             | +MVPA                  | 630 | <b>0.50 (0.29–0.86)</b> | <b>0.12 (0.05–0.28)</b> |
|                             | +SED and MVPA          | 630 | <b>0.49 (0.29–0.85)</b> | <b>0.12 (0.05–0.29)</b> |
| <b><u>Accelerometry</u></b> |                        |     |                         |                         |
| <b>SED</b>                  | Age-gender             | 932 | 1.32 (0.85–2.07)        | <b>1.83 (1.19–2.81)</b> |
|                             | +Lifestyle             | 831 | 1.59 (0.97–2.61)        | <b>2.37 (1.47–3.83)</b> |
|                             | +MVPA                  | 831 | 1.37 (0.82–2.26)        | <b>1.80 (1.09–2.96)</b> |
|                             | +Fitness               | 630 | 1.74 (0.89–3.42)        | <b>2.45 (1.26–4.79)</b> |
|                             | +MVPA and Fitness      | 630 | 1.55 (0.78–3.10)        | 1.90 (0.95–3.89)        |
| <b>LIPA</b>                 | Age-gender             | 932 | 0.85 (0.57–1.27)        | 0.72 (0.47–1.11)        |
|                             | +Lifestyle             | 831 | 0.76 (0.49–1.16)        | <b>0.56 (0.35–0.90)</b> |
|                             | +MVPA                  | 831 | 0.81 (0.53–1.26)        | <b>0.61 (0.38–0.98)</b> |
|                             | +Fitness               | 630 | 0.92 (0.53–1.61)        | 0.52 (0.27–1.01)        |
|                             | +MVPA and Fitness      | 630 | 0.97 (0.55–1.71)        | 0.52 (0.26–1.02)        |
| <b>MVPA</b>                 | Age-gender             | 932 | <b>0.33 (0.21–0.50)</b> | <b>0.31 (0.20–0.47)</b> |
|                             | +Lifestyle             | 831 | <b>0.34 (0.22–0.54)</b> | <b>0.33 (0.21–0.52)</b> |
|                             | +SED                   | 831 | <b>0.36 (0.23–0.57)</b> | <b>0.39 (0.24–0.63)</b> |
|                             | +Fitness               | 630 | <b>0.26 (0.14–0.50)</b> | <b>0.31 (0.17–0.57)</b> |
|                             | +SED and Fitness       | 630 | <b>0.28 (0.14–0.53)</b> | <b>0.36 (0.19–0.67)</b> |
| <b>TPA</b>                  | Age-gender             | 932 | <b>0.36 (0.23–0.54)</b> | <b>0.35 (0.23–0.54)</b> |
|                             | +Lifestyle             | 831 | <b>0.34 (0.21–0.53)</b> | <b>0.32 (0.22–0.55)</b> |
|                             | +SED                   | 831 | <b>0.37 (0.22–0.60)</b> | <b>0.40 (0.23–0.71)</b> |
|                             | +MVPA                  | 831 | <b>0.46 (0.27–0.77)</b> | 0.68 (0.32–1.44)        |
|                             | +Fitness               | 630 | <b>0.42 (0.23–0.76)</b> | <b>0.33 (0.17–0.62)</b> |
|                             | +SED, MVPA and Fitness | 630 | 0.84 (0.38–1.84)        | 1.31 (0.39–4.46)        |
| <b>SED bouts</b>            | Age-gender             | 930 | 1.07 (0.68–1.70)        | <b>1.73 (1.41–2.64)</b> |
|                             | +Lifestyle             | 831 | 1.20 (0.74–1.95)        | <b>2.21 (1.40–3.49)</b> |
|                             | +MVPA                  | 831 | 1.09 (0.67–1.80)        | <b>1.81 (1.13–2.90)</b> |
|                             | +Fitness               | 630 | 0.96 (0.50–1.86)        | <b>1.97 (1.06–3.64)</b> |
|                             | +MVPA and Fitness      | 630 | 0.92 (0.47–1.81)        | 1.67 (0.89–3.15)        |
| <b>SED breaks</b>           | Age-gender             | 932 | 0.74 (0.50–1.11)        | <b>0.61 (0.40–0.93)</b> |
|                             | +Lifestyle             | 831 | <b>0.63 (0.41–0.98)</b> | <b>0.50 (0.31–0.80)</b> |
|                             | +MVPA                  | 831 | 0.69 (0.44–1.07)        | <b>0.56 (0.35–0.91)</b> |
|                             | +Fitness               | 630 | 0.61 (0.34–1.09)        | 0.54 (0.28–1.03)        |
|                             | +MVPA and Fitness      | 630 | 0.68 (0.38–1.23)        | 0.56 (0.29–1.09)        |

<https://doi.org/10.1371/journal.pone.0197801.t001>

Table 4. Analyzed using ATPIII-cutoffs for triaxial accelerometry.

|                             |                        | n   | Tertile 2               | Tertile 3               |
|-----------------------------|------------------------|-----|-------------------------|-------------------------|
| <b><u>Fitness</u></b>       |                        |     |                         |                         |
|                             | Age-gender             | 784 | <b>0.50 (0.31–0.74)</b> | <b>0.09 (0.04–0.18)</b> |
|                             | +Lifestyle             | 709 | <b>0.41 (0.26–0.67)</b> | <b>0.08 (0.04–0.18)</b> |
|                             | +SED                   | 633 | <b>0.51 (0.30–0.86)</b> | <b>0.11 (0.05–0.27)</b> |
|                             | +MVPA                  | 633 | <b>0.49 (0.29–0.83)</b> | <b>0.12 (0.05–0.27)</b> |
|                             | +SED and MVPA          | 633 | <b>0.51 (0.30–0.88)</b> | <b>0.12 (0.05–0.28)</b> |
| <b><u>Accelerometry</u></b> |                        |     |                         |                         |
| <b>SED</b>                  |                        |     |                         |                         |
|                             | Age-gender             | 938 | 1.28 (0.80–2.03)        | <b>2.47 (1.60–3.83)</b> |
|                             | +Lifestyle             | 835 | 1.40 (0.83–2.35)        | <b>3.15 (1.95–5.10)</b> |
|                             | +MVPA                  | 835 | 1.24 (0.73–2.11)        | <b>2.45 (1.46–4.12)</b> |
|                             | +Fitness               | 633 | 2.23 (1.09–4.58)        | <b>3.53 (1.76–7.09)</b> |
|                             | +MVPA and Fitness      | 633 | 1.97 (0.95–4.11)        | <b>2.72 (1.31–5.63)</b> |
| <b>LIPA</b>                 |                        |     |                         |                         |
|                             | Age-gender             | 938 | <b>0.56 (0.37–0.83)</b> | <b>0.50 (0.33–0.77)</b> |
|                             | +Lifestyle             | 835 | <b>0.49 (0.32–0.75)</b> | <b>0.37 (0.23–0.59)</b> |
|                             | +MVPA                  | 835 | <b>0.54 (0.35–0.84)</b> | <b>0.42 (0.26–0.68)</b> |
|                             | +Fitness               | 633 | 0.63 (0.36–1.10)        | <b>0.40 (0.21–0.77)</b> |
|                             | +MVPA and Fitness      | 633 | 0.71 (0.40–1.26)        | <b>0.42 (0.22–0.81)</b> |
| <b>MVPA</b>                 |                        |     |                         |                         |
|                             | Age-gender             | 938 | <b>0.43 (0.29–0.65)</b> | <b>0.39 (0.26–0.59)</b> |
|                             | +Lifestyle             | 835 | <b>0.44 (0.28–0.69)</b> | <b>0.32 (0.24–0.60)</b> |
|                             | +SED                   | 835 | <b>0.52 (0.33–0.83)</b> | <b>0.55 (0.33–0.90)</b> |
|                             | +Fitness               | 633 | <b>0.43 (0.24–0.79)</b> | <b>0.36 (0.19–0.66)</b> |
|                             | +SED and Fitness       | 633 | <b>0.51 (0.28–0.95)</b> | <b>0.47 (0.24–0.90)</b> |
| <b>TPA</b>                  |                        |     |                         |                         |
|                             | Age-gender             | 930 | <b>0.36 (0.25–0.55)</b> | <b>0.35 (0.23–0.54)</b> |
|                             | +Lifestyle             | 835 | <b>0.56 (0.36–0.86)</b> | <b>0.33 (0.20–0.53)</b> |
|                             | +SED                   | 835 | 0.76 (0.46–1.24)        | 0.58 (0.30–1.12)        |
|                             | +MVPA                  | 835 | 0.65 (0.40–1.08)        | <b>0.44 (0.22–0.90)</b> |
|                             | +Fitness               | 633 | 0.58 (0.33–1.02)        | <b>0.32 (0.16–0.62)</b> |
|                             | +SED, MVPA and Fitness | 633 | 1.31 (0.57–2.99)        | 1.42 (0.39–5.21)        |
| <b>SED bouts</b>            |                        |     |                         |                         |
|                             | Age-gender             | 930 | 1.06 (0.68–1.66)        | <b>1.73 (1.14–2.63)</b> |
|                             | +Lifestyle             | 835 | 1.16 (0.71–1.89)        | <b>2.24 (1.42–3.53)</b> |
|                             | +MVPA                  | 835 | 1.08 (0.66–1.76)        | <b>1.79 (1.12–2.87)</b> |
|                             | +Fitness               | 633 | 1.35 (0.70–2.58)        | <b>2.30 (1.22–4.32)</b> |
|                             | +MVPA and Fitness      | 633 | 1.27 (0.66–2.49)        | 1.80 (0.93–3.48)        |
| <b>SED breaks</b>           |                        |     |                         |                         |
|                             | Age-gender             | 938 | 0.74 (0.50–1.10)        | <b>0.52 (0.34–0.81)</b> |
|                             | +Lifestyle             | 835 | 0.66 (0.43–1.02)        | <b>0.47 (0.29–0.75)</b> |
|                             | +MVPA                  | 835 | 0.76 (0.49–1.17)        | <b>0.55 (0.34–0.88)</b> |
|                             | +Fitness               | 633 | 0.85 (0.48–1.52)        | 0.54 (0.29–1.02)        |
|                             | +MVPA and Fitness      | 633 | 1.06 (0.58–1.92)        | 0.65 (0.34–1.24)        |

<https://doi.org/10.1371/journal.pone.0197801.t002>

## Reference

1. Ekblom Ö, Ekblom-Bak E, Rosengren A, Hallsten M, Bergström G, Börjesson M (2015) Cardiorespiratory Fitness, Sedentary Behaviour and Physical Activity Are Independently Associated with the Metabolic Syndrome, Results from the SCAPIS Pilot Study. PLoS ONE 10(6): e0131586. <https://doi.org/10.1371/journal.pone.0131586> PMID: 26120842
